# Supplementary material
Source: PubMed Central journal article supplement (PMC8454572)
Supplement: mmc1.pdf [file mmc1.pdf]

**XINN, Volume 1**

## **Supplemental Information**

### **Laboratory Diagnosis and Monitoring the Viral**

#### **Shedding of SARS-CoV-2 Infection**

**Yang Yang, Minghui Yang, Jing Yuan, Fuxiang Wang, Zhaoqin Wang, Jinxiu Li, Mingxia Zhang, Li Xing, Jinli Wei, Ling Peng, Gary Wong, Haixia Zheng, Weibo Wu, Chenguang Shen, Mingfeng Liao, Kai Feng, Jianming Li, Qianting Yang, Juanjuan Zhao, Lei Liu, and Yingxia Liu**

**Figure S1. Serial detection of viral RNA in 7 COVID-19 cases from whom SARS-CoV-2 RNA was not detected in the upper respiratory specimens for at least the first 3 times.** Numbers of cases from severe and mild groups were marked in red and black, respectively. The detection results of samples from upper respiratory tract were in green, and lower respiratory tract in black. Lower cycle threshold (Ct) values indicate higher viral loads. The black and red arrows indicate hospital admission and the start of antiviral treatment, respectively.

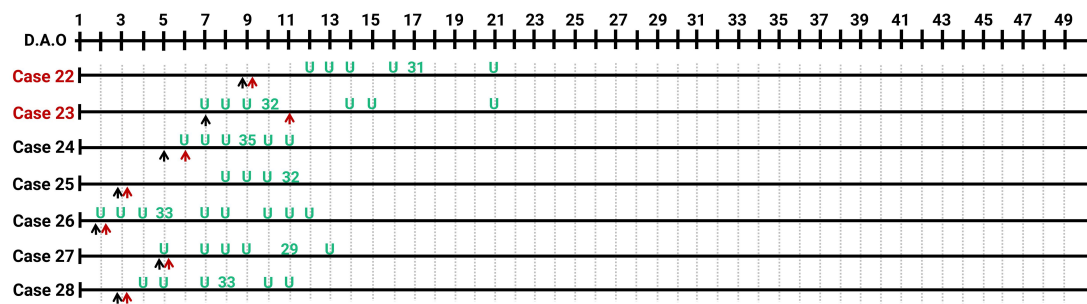

**Table S1. Epidemiological and clinical characteristics of twelve cases from whom SARS-CoV-2 RNA was not detected in the upper respiratory specimens for at least the first three times.**

| Case No. | Group | Sex    | Age | Initial symptoms                          | Underling diseases     | Exposure history                | Indexes of lung injury             |              |
|----------|-------|--------|-----|-------------------------------------------|------------------------|---------------------------------|------------------------------------|--------------|
|          |       |        |     |                                           |                        |                                 | PiO <sub>2</sub> /FiO <sub>2</sub> | Murray score |
| Case 02  | S     | Female | 65  | Fever, cough, myalgia, chill and diarrhea | Hypertension           | Travelled to Wuhan              | 227                                | 1.75         |
| Case 04  | S     | Male   | 63  | Fever                                     | Asthma                 | Travelled to Wuhan              | 83                                 | 3.75         |
| Case 06  | S     | Male   | 47  | Fever, cough, myalgia                     | No                     | Unknown                         | 403                                | 2.25         |
| Case 07  | S     | Male   | 34  | Fever, Myalgia and diarrhea               | No                     | Lived in Wuhan                  | 328                                | 1.5          |
| Case 21  | M     | Male   | 36  | Cough and diarrhea                        | No                     | Travelled to Wuhan with case 02 | 440                                | 0.75         |
| Case 22  | S     | Female | 76  | Fatigue                                   | Hypertension, Diabetes | Lived in Wuhan                  | 188                                | 1.25         |
| Case 23  | S     | Male   | 56  | Fever                                     | No                     | Close contact                   | 212                                | 1            |
| Case 24  | M     | Male   | 10  | No symptoms                               | No                     | Travelled to Wuhan with case 02 | 633                                | 0.75         |
| Case 25  | M     | Male   | 61  | Fever and cough                           | Hypertension           | Lived in Huanggang              | 340                                | 1            |
| Case 26  | M     | Female | 26  | Fever                                     | No                     | Lived in Wuhan                  | NA                                 | NA           |
| Case 27  | M     | Male   | 48  | Fever and headache                        | No                     | Close contact                   | 334                                | 1.25         |
| Case 28  | M     | Female | 73  | Fever and diarrhea                        | Diabetes               | Lived in Wuhan                  | 438                                | 1            |

NA: Not available.

Huanggang: A city in Hubei province with a distance of about 70 miles away from Wuhan.
